# Supplementary material
Source: publisher figshare collection journal article supplement (https://acs.figshare.com/ndownloader/files/5218672)

**Facile Synthesis of Various Phosphine-Stabilized Monodisperse Palladium Nanoparticles through the Understanding of Coordination Chemistry of the Nanoparticles**

*Seung Uk Son, Youngjin Jang, Ki Youl Yoon, Eunae Kang, and Taeghwan Hyeon\**

National Creative Research Center for Oxide Nanocrystalline Materials and School of Chemical Engineering, Seoul National University, Seoul 151-744, Korea

**Figure S1.** TEM image of Pd nanoparticles synthesized by directly reacting Pd(acac)<sub>2</sub> and TPP.

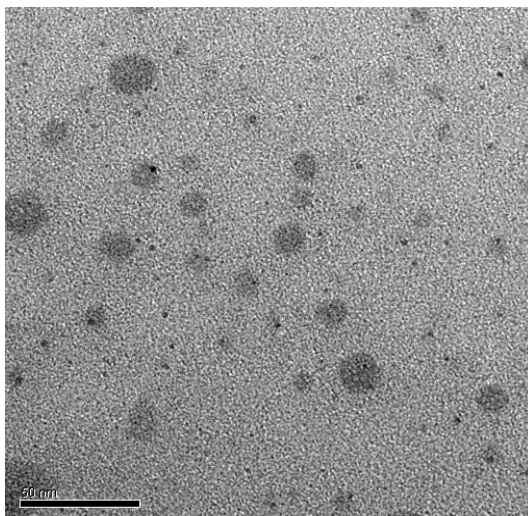

**Figure S2.** TEM image water dispersable Pd nanoparticles stabilized with TPPDS after heated at 80 °C for 4h.

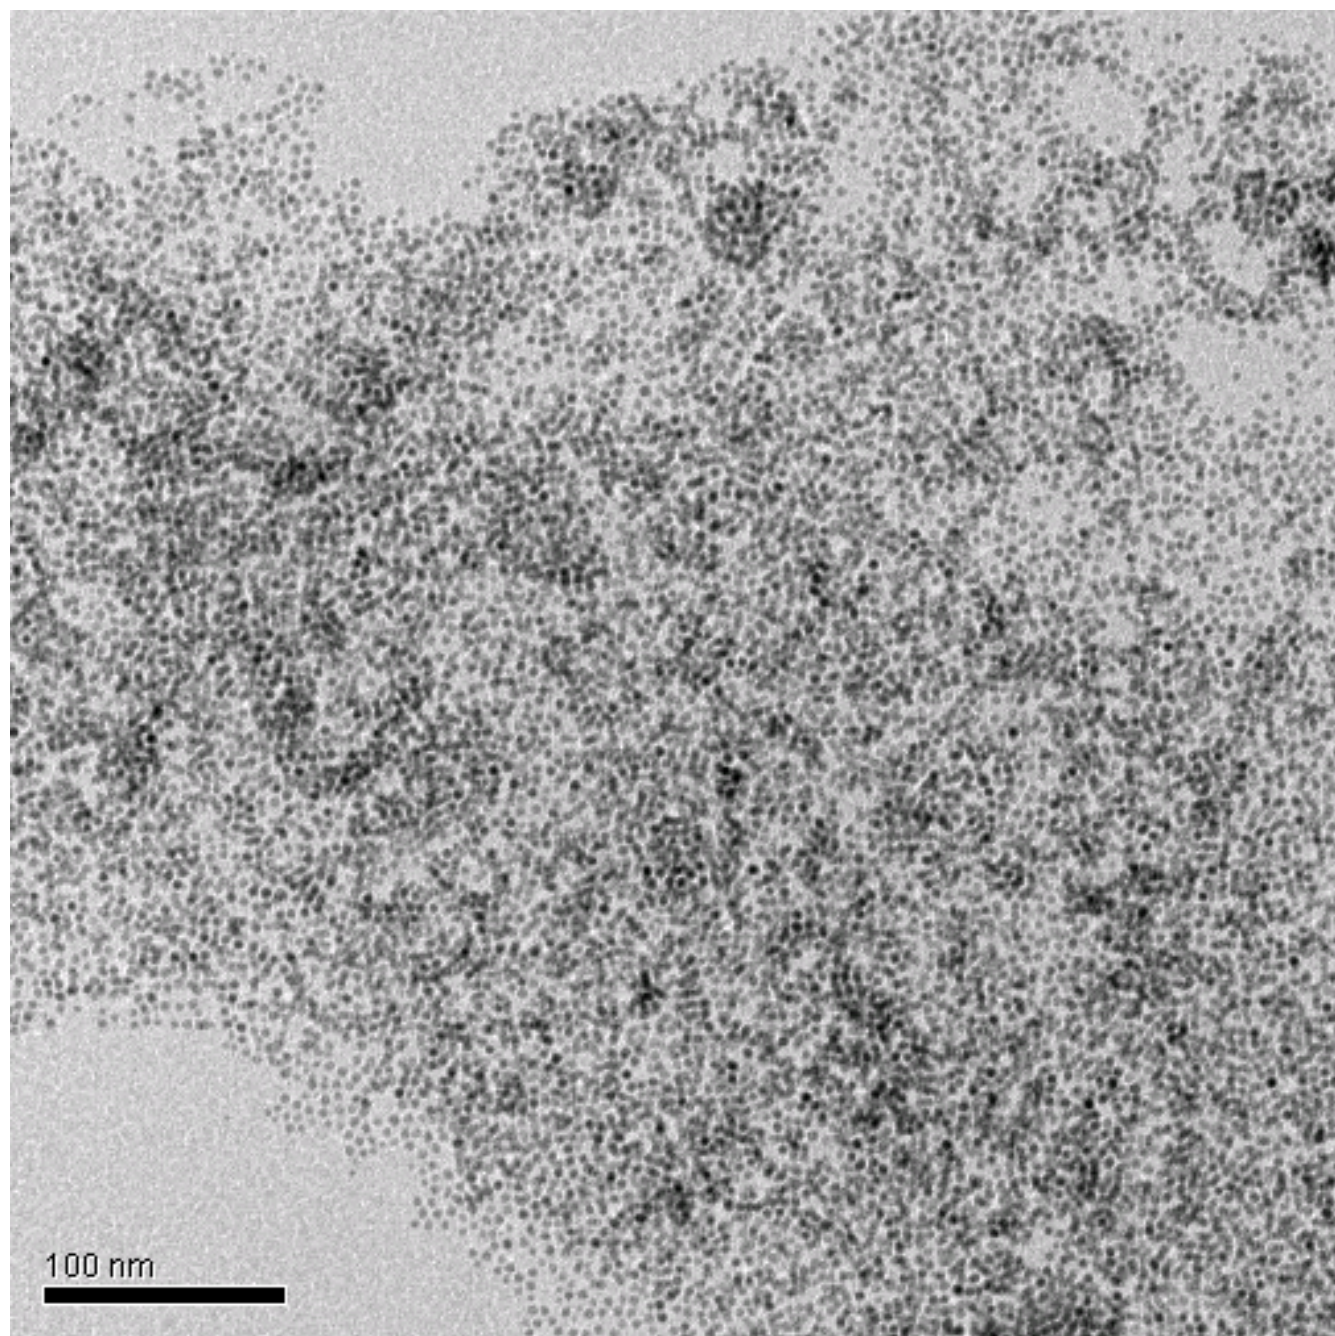

Supplement: Supplementary file 1 [file 5218672]
